# Supplementary material for: Different-sized black phosphorus nanosheets with good cytocompatibility and high photothermal performance
Source: Royal Society of Chemistry journal article supplement (doi:10.1039/c7ra00160f), 2017-01-01
Supplement: c7ra00160f1.pdf [file c7ra00160f1.pdf]

## Supporting Information

### Different-sized black phosphorus nanosheets with good cytocompatibility and high photothermal performance

Haidi Fu,<sup>a,b</sup> Zhibin Li,<sup>b,c</sup> Hanhan Xie,<sup>b</sup> Zhengbo Sun,<sup>b</sup> Beike Wang,<sup>a</sup> Hao Huang,<sup>b</sup> Guangli Han,<sup>a,\*</sup> Huaiyu Wang,<sup>b</sup> Paul K. Chu<sup>c</sup> & Xue-Feng Yu<sup>b</sup>

<sup>a</sup> *State Key Laboratory Breeding Base of Basic Science of Stomatology (Hubei-MOST) and Key Laboratory for Oral Biomedicine of Ministry of Education (KLOBM), School and Hospital of Stomatology, Wuhan University, 237 Luoyu Road, Wuhan 430079, P. R. China.*

<sup>b</sup> *Institute of Biomedicine and Biotechnology, Shenzhen Institutes of Advanced Technology, Chinese Academy of Sciences, Shenzhen 518055, P. R. China.*

<sup>c</sup> *Department of Physics and Materials Science, City University of Hong Kong, Tat Chee Avenue, Kowloon, Hong Kong, P.R. China.*

\* Correspondence and requests for materials should be addressed to G.L.H (email: [guanglihan@hotmail.com](mailto:guanglihan@hotmail.com))

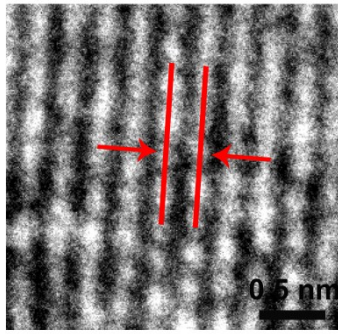

**Figure S1.** HRTEM image of BP nanosheets.

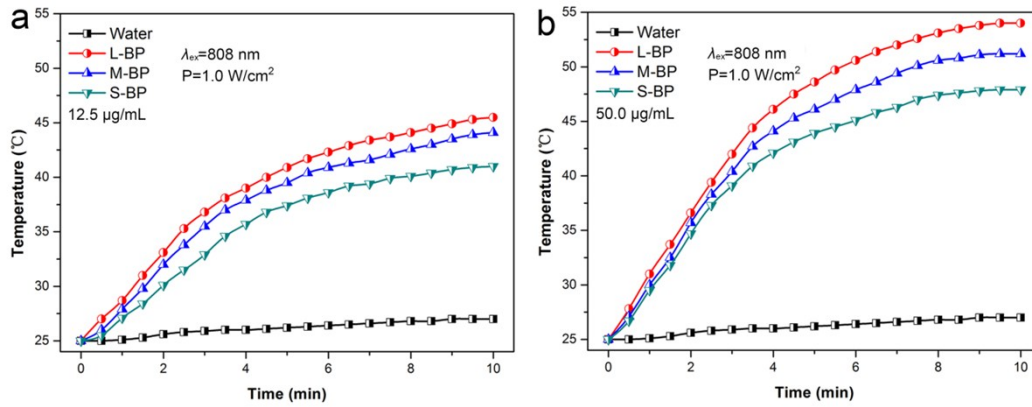

**Figure S2.** Photothermal heating curves of distilled water and the L-BP, M-BP, S-BP water suspension at different concentrations (12.5 and 50.0 µg/mL) irradiated with an 808 nm laser (1.0 W/cm<sup>2</sup>). (a) 12.5 µg/mL. (b) 50.0 µg/mL.

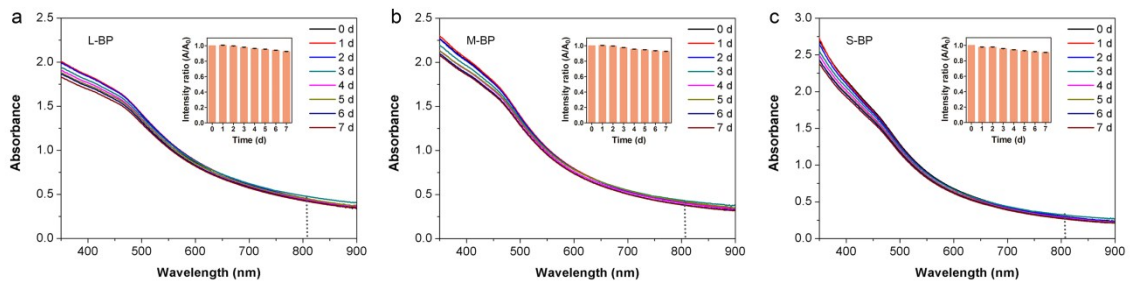

**Figure S3.** Absorbance spectra of L-BP (a), M-BP (b), S-BP (c) stored in DMSO for up to 7 days. Insets: Absorption ratios ( $A/A_0$ ) at 808 nm.

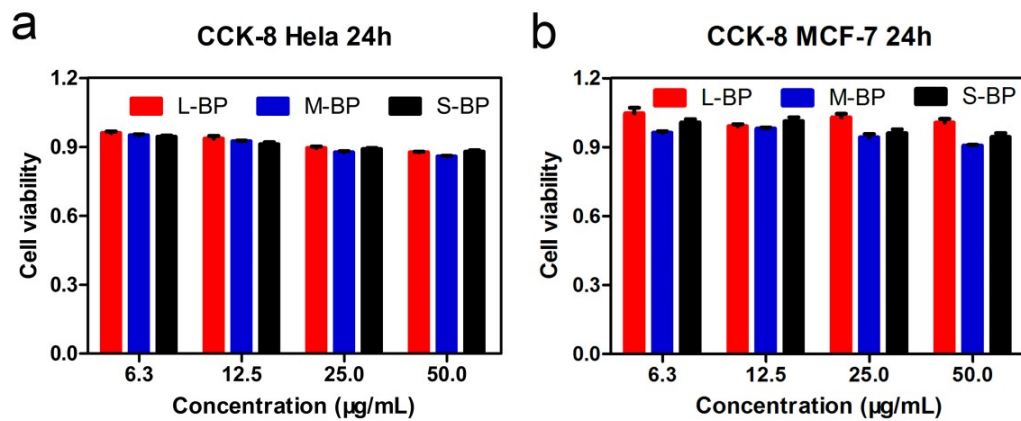

**Figure S4.** CCK-8 assays of (a) HeLa cells, and (b) MCF-7 cells before and after the incubation with the three BP nanosheets for 24 h at different concentrations (6.3, 12.5, 25.0 and 50.0 µg/mL). The data are represented as means  $\pm$  standard deviation. Almost no cytotoxicity can be observed for the two types of cells even at a high concentration of 50.0 µg/mL.
